# Supplementary material for: Parallel PRC2/cPRC1 and vPRC1 pathways silence lineage-specific genes and maintain self-renewal in mouse embryonic stem cells
Source: PubMed Central journal article supplement — Sci Adv. 2020 Apr 1;6(14):eaax5692. doi: 10.1126/sciadv.aax5692 (PMC7112768; doi:10.1126/sciadv.aax5692), 2020-04-01
Supplement: aax5692_SM.pdf [file aax5692_SM.pdf]

## Supplementary Materials for

### **Parallel PRC2/cPRC1 and vPRC1 pathways silence lineage-specific genes and maintain self-renewal in mouse embryonic stem cells**

J. A. Zepeda-Martinez, C. Pribitzer, J. Wang, D. Bsteh, S. Golumbeanu, Q. Zhao, T. R. Burkard, B. Reichholf, S. K. Rhie, J. Jude, H. F. Moussa, J. Zuber, O. Bell\*

\*Corresponding author. Email: oliver.bell@med.usc.edu

Published 1 April 2020, *Sci. Adv.* **6**, eaax5692 (2020)  
DOI: 10.1126/sciadv.aax5692

#### **This PDF file includes:**

Figs. S1 to S9

Tables S1 to S3

Uncropped Western blots of proteins from Fig. 2A and fig. S3B.

Uncropped Western blots of proteins from figs. S5B, S6A, and S9A.

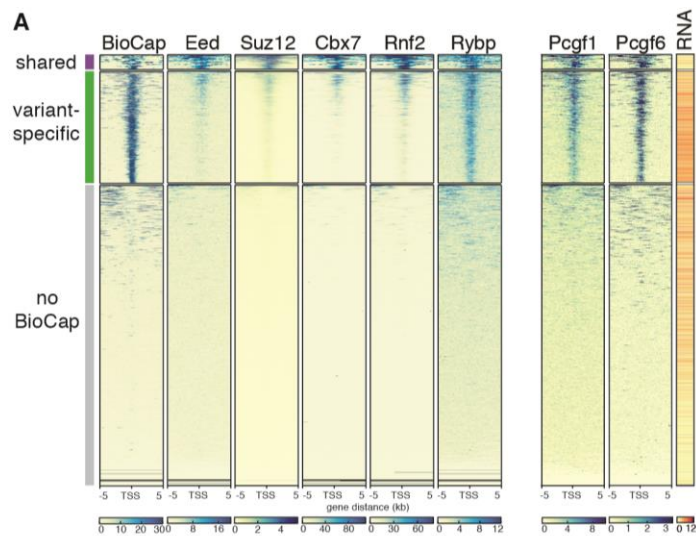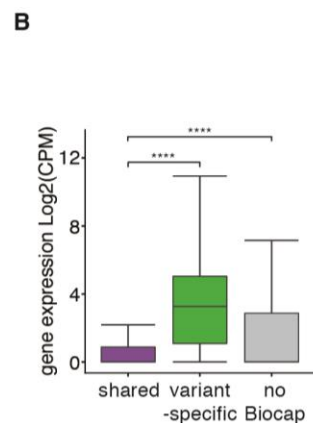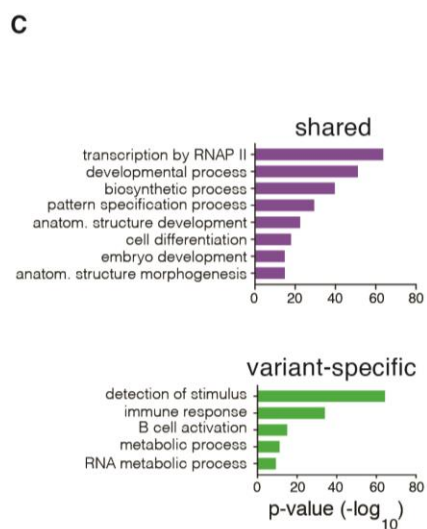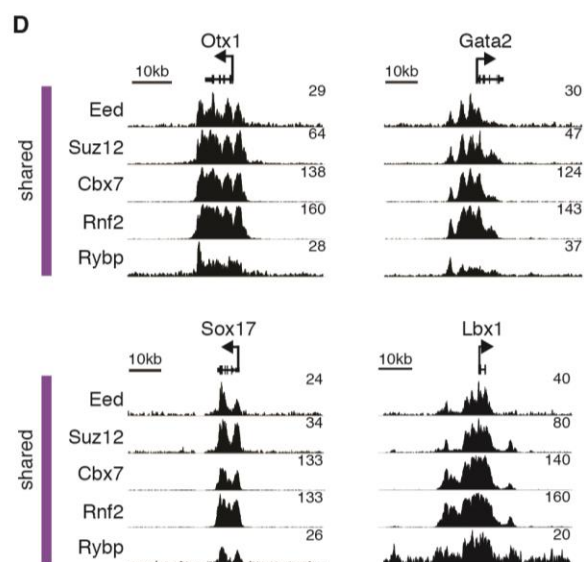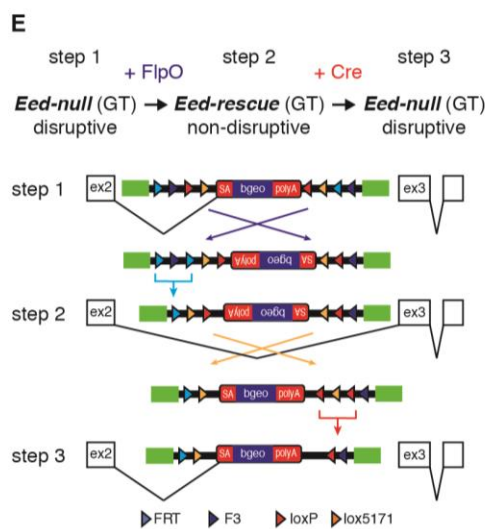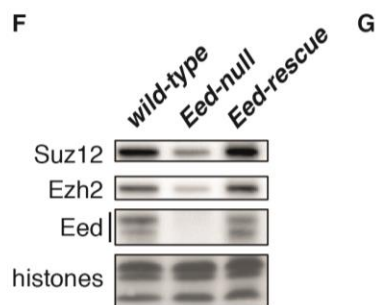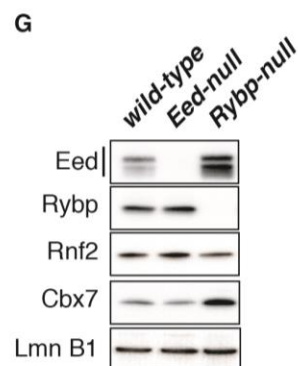

**Fig. S1. Genomic distribution of PRC1 and PRC2 and generation of single mutant mESCs.** (A) Heat maps of Eed, Suz12, Cbx7, Rnf2, Rybp, Pcgf1 and Pcgf6 centered around the TSS of CGI promoters (+/- 5kb) show relative enrichment in *wild-type* mESCs. TSSs are separated by k-means into “shared” (965 TSSs - violet), “variant-specific” (7,333 TSSs - green) and “noBioCap” clusters (19,712 TSSs - gray). TSSs were ranked by enrichment of canonical PRC1 (Rnf2, Cbx7), variant PRC1 (Rnf2, Rybp), PRC2 (Eed) subunits and un-methylated CGIs (BioCap). Colored scales (bottom) show dynamic range of ChIP-seq signal. (B) Boxplot quantification of gene expression (QuantSeq) at the three cluster from A). p-values calculated using Wilcoxon test (\*\*\*\*:  $p < 1e-04$ ). (C) Gene Ontology (GO) analysis compares enriched categories of shared (violet) and variant-specific (green) PcG target genes. (D) Genomic screenshots of selected “shared” Polycomb target genes encoding developmental transcription factors. (E) Schematic representation of gene-trap disruption and rescue of *Eed* gene expression in haploid mESC line. FlpO and Cre indicate DNA recombinases facilitating inversion at recombination sites. *Eed-null* (GT) (step 1) and *Eed-rescue* (GT) (step 2) mESCs have been used in this study. (F) Western blot of Eed, Suz12 and Ezh2 in wild-type, *Eed-null* and *Eed-rescue* mESCs. Ponceau staining serves as loading control. (G) Western blot of Eed, Rnf2, Cbx7 and Rybp in *wild-type*, *Eed-null* and *Rybp-null* mESCs. Lmn B1 serves as loading control.

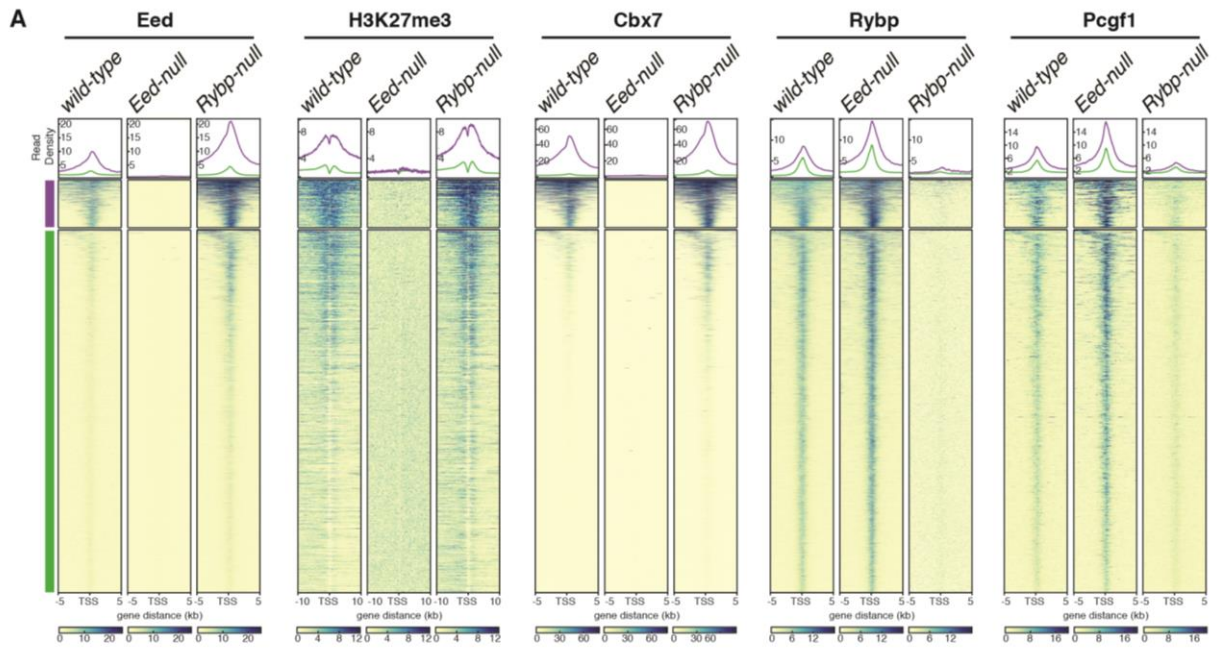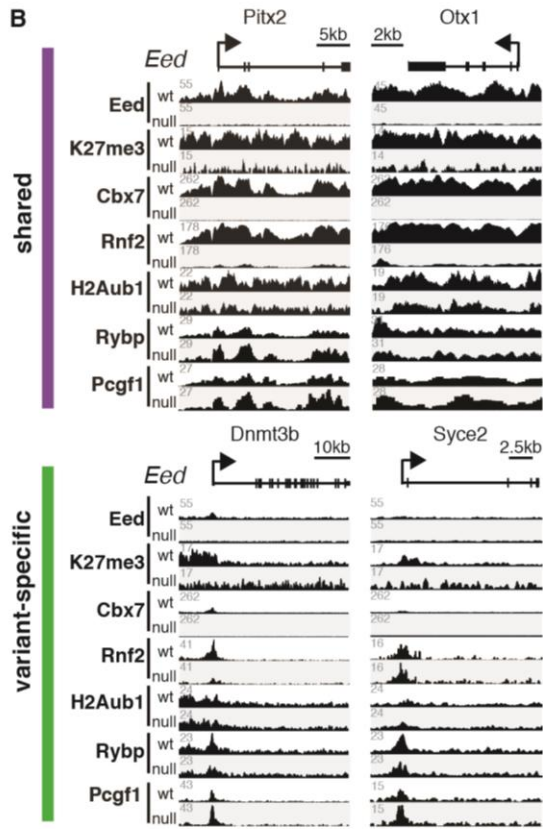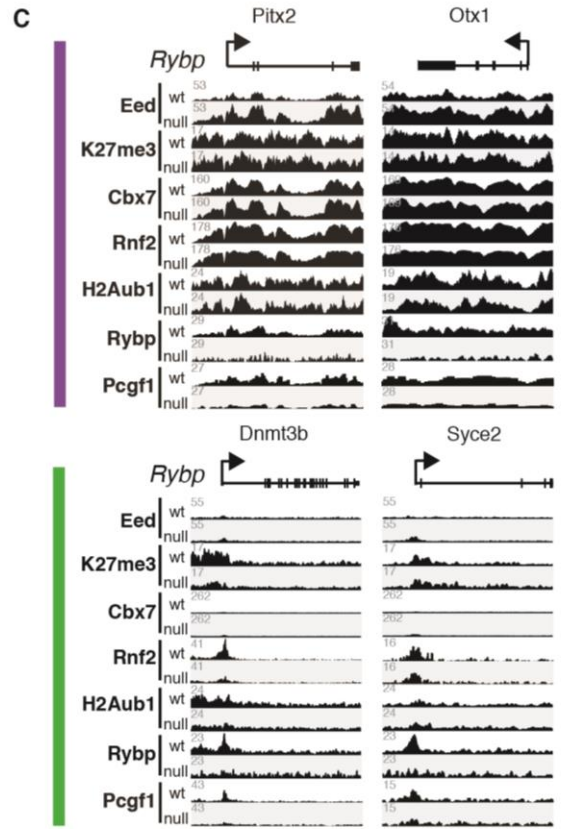

**Fig. S2. PcG protein occupancy and histone modifications in single mutant mESCs. (A)** Meta plots and heat maps compare Eed, H3K27me3, Cbx7, Rybp and Pcgf1 enrichments centered around the TSS of CGI promoters (+/- 5kb or +/- 10kb) at “shared” (violet) and “variant-specific” (green) genes in *wild-type*, *Eed-null* and *Rybp-null* mESCs. Colored scales (bottom) show dynamic range of ChIP-seq signals. Genomic screenshots of representative “shared” and “variant-specific” Polycomb target genes display relative enrichment of PcG proteins and histone modifications (n=2) in **(B)** *wild-type* and *Eed-null* mESCs and **(C)** in *wild-type* and *Rybp-null* mESCs.

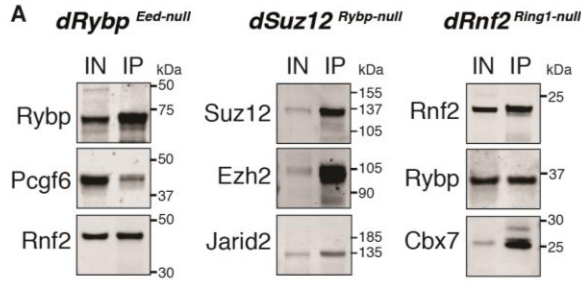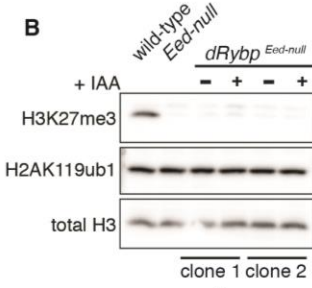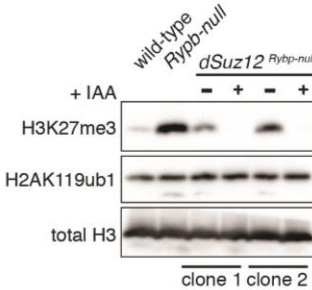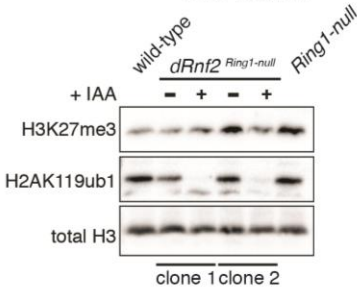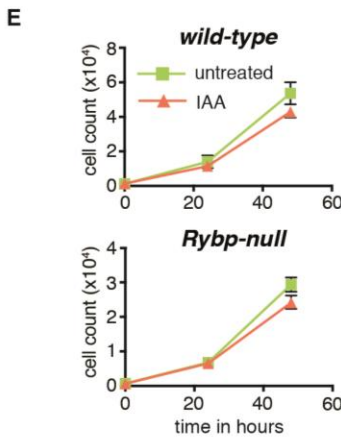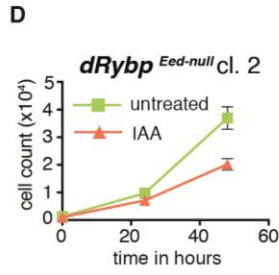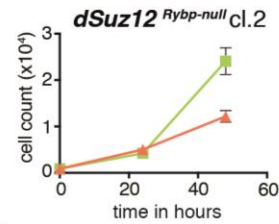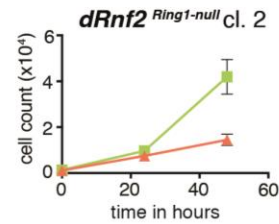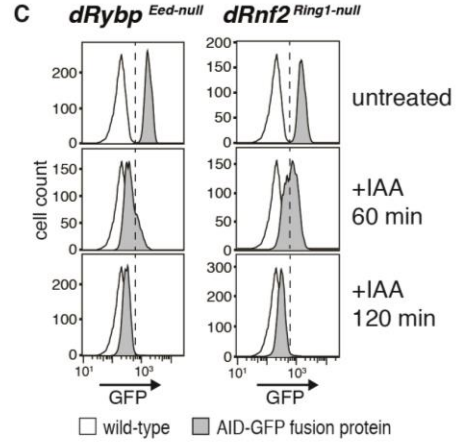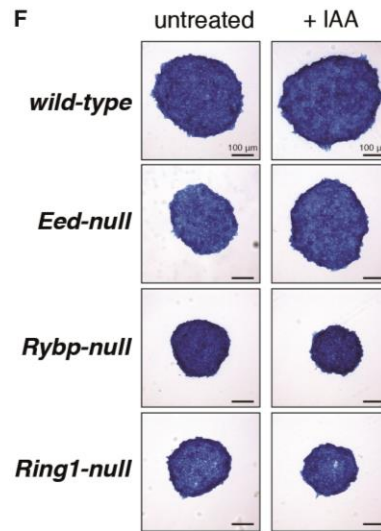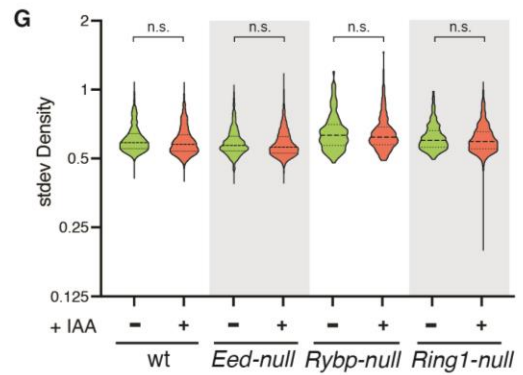

**Fig. S3. Combined PcG protein depletion triggers loss of mESC self-renewal.** (A) Co-immunoprecipitation of AID tagged fusion proteins from nuclear extracts of *dRybp<sup>Eed-null</sup>* (left), *dSuz12<sup>Rybp-null</sup>* (middle) and *dRnf2<sup>Ring1-null</sup>* (right) mESCs using FLAG antibody and analysis by western blot with indicated antibodies. (B) Western blots of histone modifications in *wild-type*, *Eed-null* mESCs and two independent clones of *dRybp<sup>Eed-null</sup>* mESCs (top), in *wild-type*, *Rybp-null* mESCs and two independent clones of *dSuz12<sup>Rybp-null</sup>* mESCs (middle) and in *wild-type*, *Ring1-null* mESCs and two independent clones of *dRnf2<sup>Ring1-null</sup>* mESCs (bottom). IAA treatment (250  $\mu$ M) for 24 hours. Western blot for total histone H3 serves as loading control. (C) Flow cytometry histograms display expression of PcG protein fusions with AID-GFP (gray) in *dRybp<sup>Eed-null</sup>* (left) and *dRnf2<sup>Ring1-null</sup>* (right) before, after 60 mins and 120 minutes of IAA treatment. White histogram shows expression of control cells without GFP. (D) Proliferation assays of additional independent clones of *dRybp<sup>Eed-null</sup>*, *dSuz12<sup>Rybp-null</sup>* and *dRnf2<sup>Ring1-null</sup>* mESCs grown in serum conditions for 72 hours without (untreated) or with 250 $\mu$ M IAA. Live cells were quantified by flow cytometry every 24 hours starting at 24 hours (time point 0h). Displayed are the median and standard deviation of four replicates. (E) Proliferation assays of *wild-type*, *Eed-null* and *Rybp-null* and *Ring1-null* mESCs grown in serum conditions for 72 hours without (untreated) or with 250 $\mu$ M IAA. Live cells were quantified by flow cytometry every 24 hours starting at 24 hours (time point 0h). Displayed are the median and standard deviation of four replicates. (F) Representative images of alkaline phosphatase staining of *wild-type*, *Eed-null* and *Rybp-null* and *Ring1-null* mESC colonies cultured in absence (untreated) or presence or 250 $\mu$ M IAA for five days. (G) Box plots display Standard Deviation of Density quantifying the degree of mESC colony heterogeneity in response to five days of IAA treatment. Statistical significance calculated using unpaired t-test (p-value <0.01)



**A**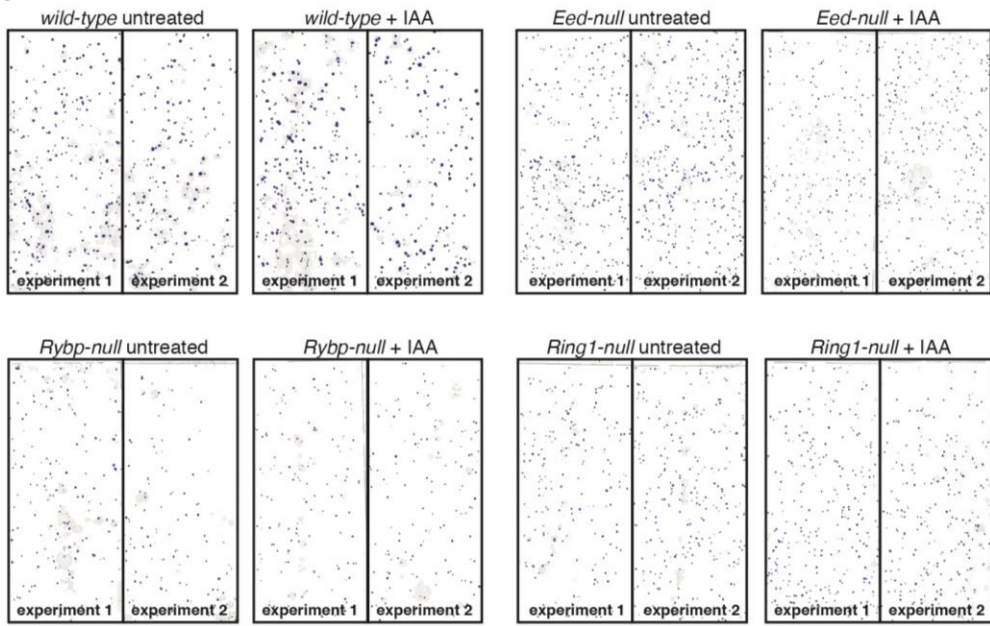**B**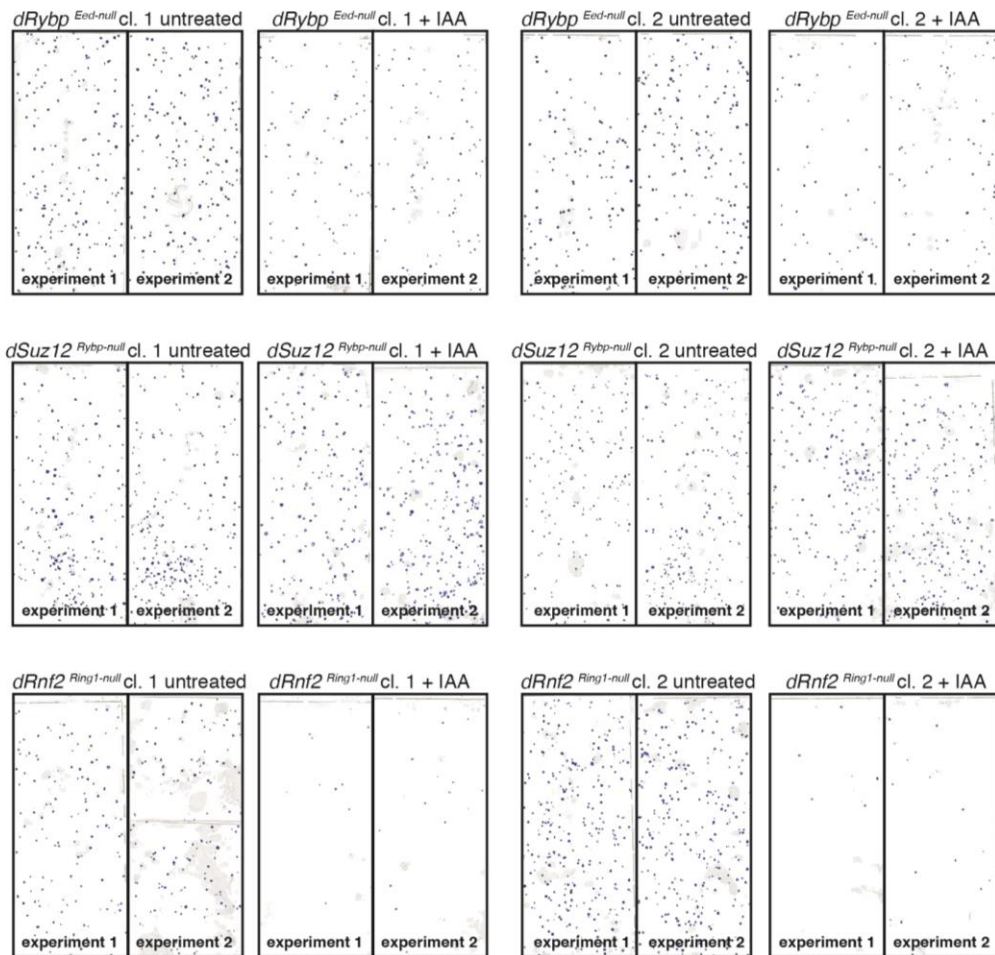



**Fig. S4. AP staining of untreated and IAA-treated mESCs.** (A) Slides showing AP staining from two independent experiments of *wild-type*, *Eed-null* and *Rybp-null* and *Ring1-null* mESC colonies cultured in absence (untreated) or presence or 250μM IAA for five days. (B) Slides showing AP staining of *dRybp*<sup>*Eed-null*</sup>, *dSuz12*<sup>*Rybp-null*</sup> and *dRnf2*<sup>*Ring1-null*</sup> mESC colonies from two independently derived clones cultured in absence (untreated) or presence or 250μM IAA for five days.

**A**

|              |      |             |              |                            |
|--------------|------|-------------|--------------|----------------------------|
|              | null | <i>Rybp</i> | <i>Suz12</i> | <i>Suz12</i><br><i>Eed</i> |
| AID          |      |             |              |                            |
| <i>Suz12</i> |      | ●           |              |                            |
| <i>Rybp</i>  |      |             | ●            | ●                          |

**B**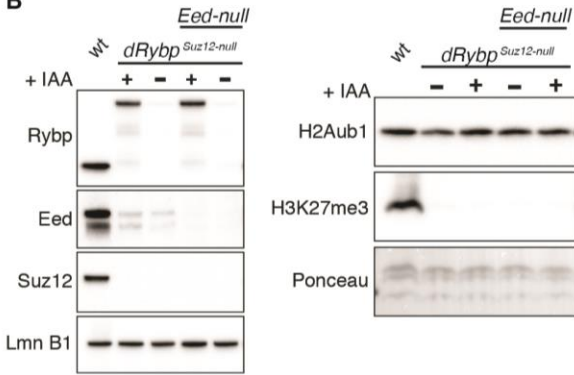**C**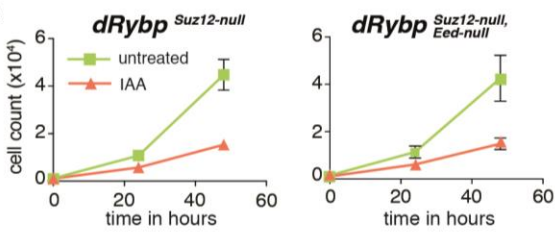**D**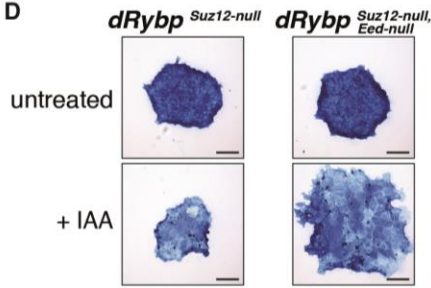**E**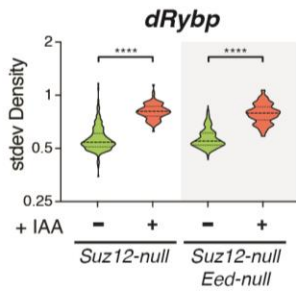**F**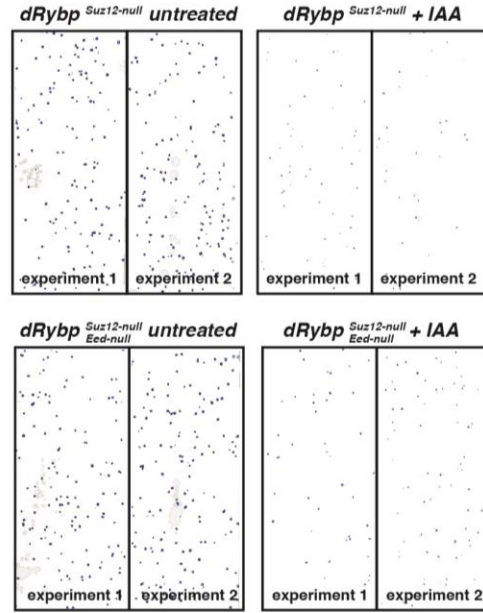**G**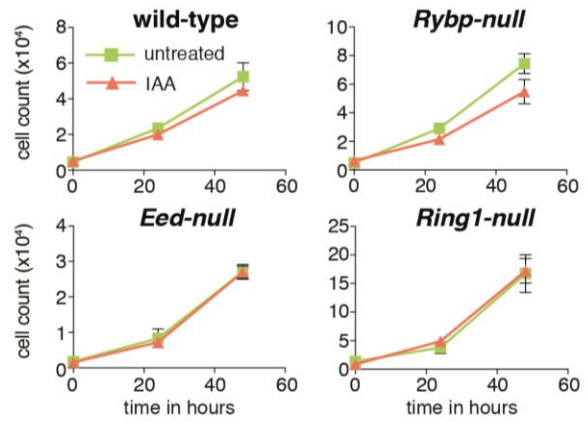**H**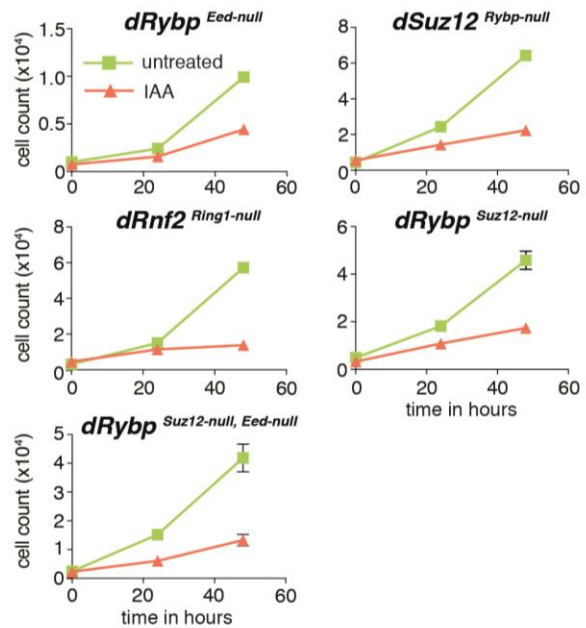

**Fig. S5. Consequences of Rybp degradation in Suz12-null and Suz12/Eed-null mESCs.** (A)

Table summarizes engineered degen mESCs with inducible degradation of either Rybp or Suz12. (B) Western blot of PcG proteins and histone modifications in *wild-type*, *dRybp<sup>Suz12-null</sup>* and *dRybp<sup>Suz12-null, Eed-null</sup>* mESCs (left). IAA treatment (250  $\mu$ M) for 24 hours leads to degradation of AID-fusion protein. Lamin B1 (Lmn B1) and Ponceau staining serve as loading controls. (C) Proliferation assays of *dRybp<sup>Suz12-null</sup>* and *dRybp<sup>Suz12-null, Eed-null</sup>* mESCs grown in serum conditions for 72 hours without (untreated) or with 250 $\mu$ M IAA. Live cells were quantified by flow cytometry every 24 hours. Displayed is the median and standard deviation of four replicate measurements starting at 24 hours IAA (time point 0h). (D) Representative images of Alkaline phosphatase staining of *dRybp<sup>Suz12-null</sup>* and *dRybp<sup>Suz12-null, Eed-null</sup>* mESC colonies cultured in absence (untreated) or presence or 250 $\mu$ M IAA for five days. (E) Box plots display Standard Deviation of Density quantifying the degree of mESC colony heterogeneity in response to five days of IAA treatment. Statistical significance calculated using unpaired t-test (p-value <0.01). (F) Slides showing AP staining from two independent experiments of *dRybp<sup>Suz12-null</sup>* and *dRybp<sup>Suz12-null, Eed-null</sup>* mESC colonies cultured in absence (untreated) or presence or 250 $\mu$ M IAA for five days. (G) Proliferation assays of *wild-type*, *Eed-null*, *Rybp-null* and *Ring1-null* mESCs grown in 2i conditions for 72 hours without (untreated) or with 250 $\mu$ M IAA. Live cells were quantified by flow cytometry every 24 hours. Displayed is the median and standard deviation of four replicates. (H) Proliferation assays of *dRybp<sup>Eed-null</sup>*, *dRnf2<sup>Ring1-null</sup>*, *dSuz12<sup>Rybp-null</sup>* and *dRybp<sup>Suz12-null</sup>* mESCs grown in 2i conditions for 72 hours without (untreated) or with 250 $\mu$ M IAA. Live cells were quantified by flow cytometry every 24 hours starting at 24 hours (time point 0h). Displayed is the median and standard deviation of four replicates.

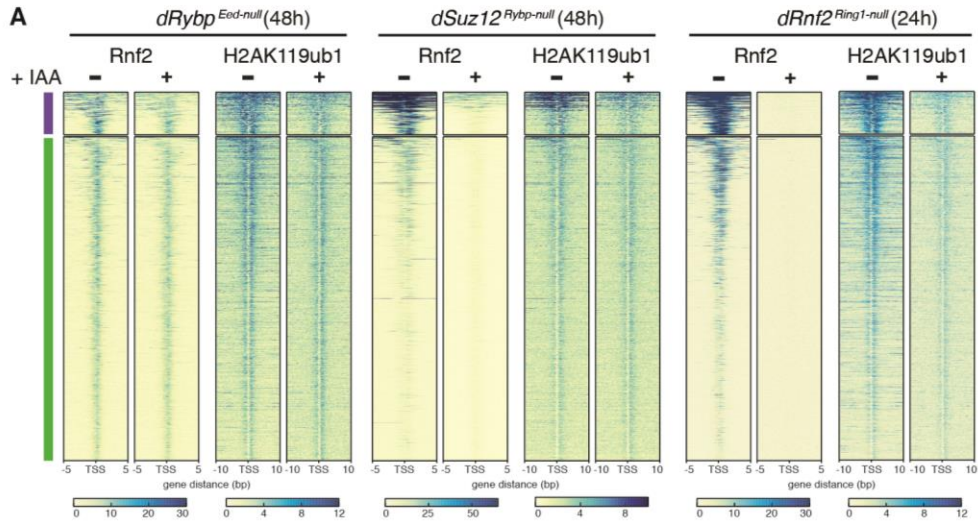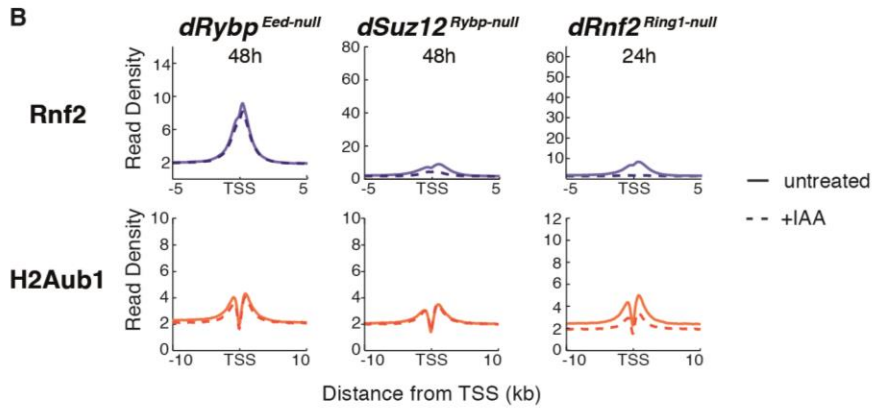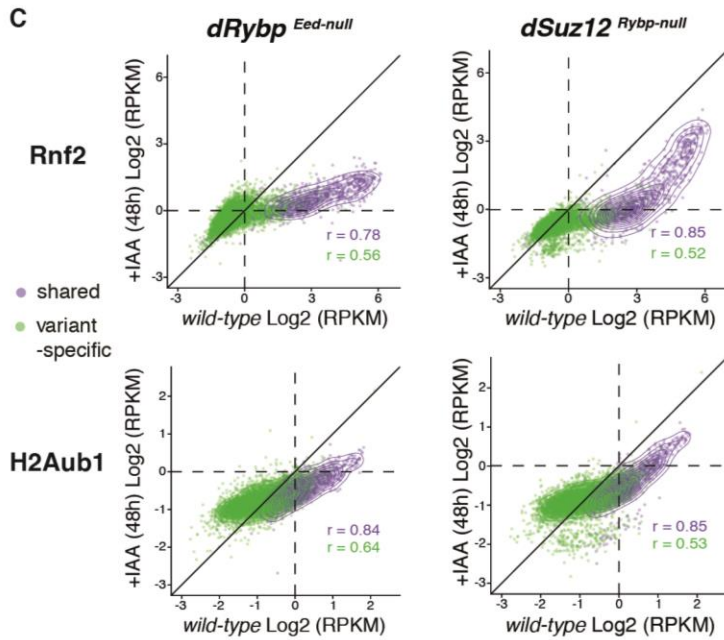

**Fig. S6. Rnf2 occupancy and H2AK119ub1 in IAA-treated degran mESCs.** (A) Heat maps of ChIP-seq of Rnf2 and H2AK119ub1 around CGI TSSs (+/- 5kb or +/- 10kb) at “shared” (violet) and “variant-specific” (green) genes in *dRybp<sup>Eed-null</sup>*, *dSuz12<sup>Rybp-null</sup>* and *dRnf2<sup>Ring1-null</sup>* mESCs before and after IAA treatment as indicated. Colored scales (bottom) show dynamic range of ChIP-seq. (B) Meta plots of Rnf2 and H2AK119ub1 (H2Aub1) ChIP-seq at “variant-specific” genes in *dRybp<sup>Eed-null</sup>*, *dSuz12<sup>Rybp-null</sup>* and *dRnf2<sup>Ring1-null</sup>* mESCs before and after IAA treatment as indicated in Fig. 3C). (C) Density scatter plot of Rnf2 (top, +/- 5kb around TSS) and in H2AK119ub1 (H2Aub1) (bottom, +/- 10kb around TSS) signals in wild-type and IAA-treated *dRybp<sup>Eed-null</sup>* (left) and *dSuz12<sup>Rybp-null</sup>* (right) mESCs. r - Pearson’s correlation coefficient, “shared” TSSs (violet), “variant-specific” TSSs (green).





**Fig. S7. Impact of combined PcG protein depletion on gene regulation.** (A) Scatter plot compares gene expression changes between *dRybp*<sup>Eed-null</sup> and *dRnf2*<sup>Ring1-null</sup> (top), and *dSuz12*<sup>Rybp-null</sup> and *dRnf2*<sup>Ring1-null</sup> mESCs following 48h of IAA treatment. r and p denote Pearson correlation coefficient and P-value. (B) Analysis of Gene Ontology categories of downregulated genes in response to IAA treatment of *dRybp*<sup>Eed-null</sup>, *dSuz12*<sup>Rybp-null</sup> and *dRnf2*<sup>Ring1-null</sup> mESCs at 24h and 48h. The color indicates the significance and the size represents the fraction of genes in each category. (C) Volcano plots show gene expression changes of IAA-treated relative to untreated *dRybp*<sup>Eed-null</sup>, *dSuz12*<sup>Rybp-null</sup> and *dRnf2*<sup>Ring1-null</sup> mESCs cultured in 2i conditions at 48h. Differential gene expression (red, padj < 0.1) was calculated by averaging two independent clones per genotype, each sequenced in triplicates. Displayed are annotations of differentially expressed genes. (D) Venn diagrams show overlap of differentially expressed genes in *dRybp*<sup>Eed-null</sup> (red circles), *dSuz12*<sup>Rybp-null</sup> (green) and *dRnf2*<sup>Ring1-null</sup> (blue) mESCs cultured in 2i conditions at 48h of IAA treatment.

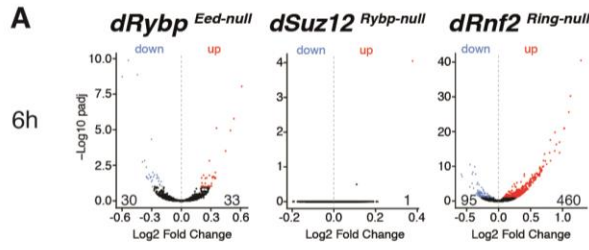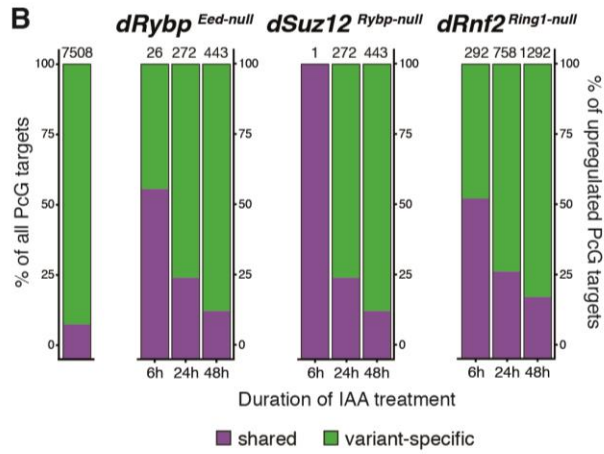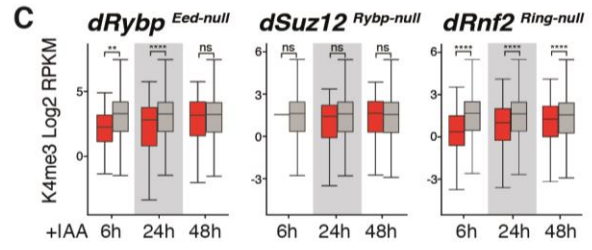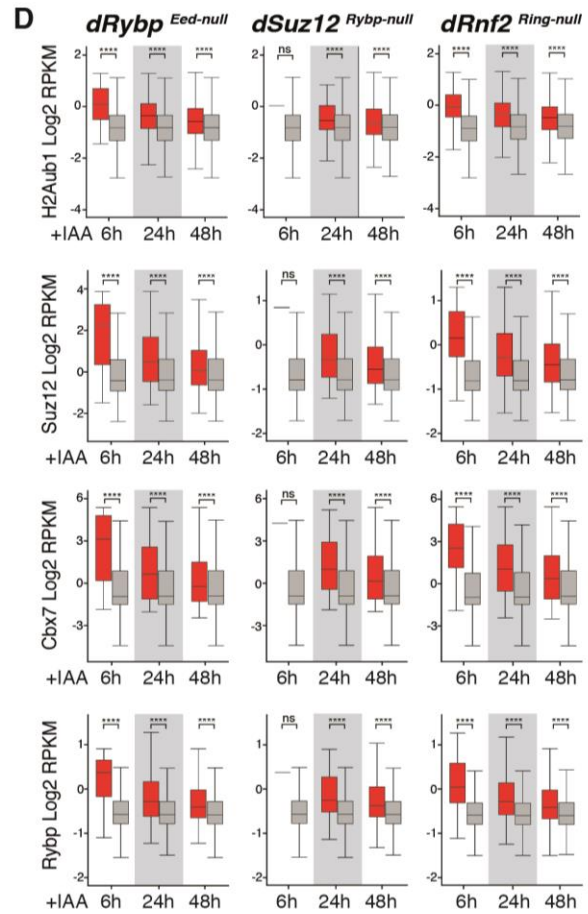

**Fig. S8. Genes with large Polycomb domains are most vulnerable to PRC1 loss.** (A) Volcano plots show gene expression changes of IAA-treated relative to untreated *dRybp<sup>Eed-null</sup>*, *dSuz12<sup>Rybp-null</sup>* and *dRnf2<sup>Ring1-null</sup>* mESCs at 6h. down (blue) – number of repressed genes, up (red) – number of upregulated genes. Differential gene expression ( $\text{padj} < 0.1$ ) was calculated by averaging two independent clones per genotype, each sequenced in triplicates. (B) Bar graphs show the fractions of “shared” and “variant-specific” genes among all Polycomb target genes (left) and the fraction of differentially expressed “shared” and “variant-specific” genes ( $\text{padj} < 0.1$ ) at 6h, 24h and 48h of IAA-treated *dRybp<sup>Eed-null</sup>*, *dSuz12<sup>Rybp-null</sup>* and *dRnf2<sup>Ring1-null</sup>* mESCs. (C) Box plots display *wild-type* levels of H3K4me3 (+/- 10kb around TSS) of genes upregulated (red) or unchanged (grey) at 6h, 24h and 48h of IAA treatment of *dRybp<sup>Eed-null</sup>*, *dSuz12<sup>Rybp-null</sup>* and *dRnf2<sup>Ring1-null</sup>* mESCs. Significance (p-value) calculated using Wilcoxon test (\*\*:  $p < 0.01$ ; \*\*\*\*:  $p < 0.001$ ; \*\*\*\*\*:  $p < 1e-04$ ). (D) Box plots display *wild-type* levels of H2AK119ub1 (H2Aub1) (+/- 10kb around TSS), Suz12, Cbx7 and Rybp (all +/- 5kb around TSS) of genes upregulated (red) or unchanged (grey) at 6h, 24h and 48h of IAA treatment of *dRybp<sup>Eed-null</sup>*, *dSuz12<sup>Rybp-null</sup>* and *dRnf2<sup>Ring1-null</sup>* mESCs. Significance (p-value) calculated using Wilcoxon test (\*\*:  $p < 0.01$ ; \*\*\*\*:  $p < 0.001$ ; \*\*\*\*\*:  $p < 1e-04$ ).

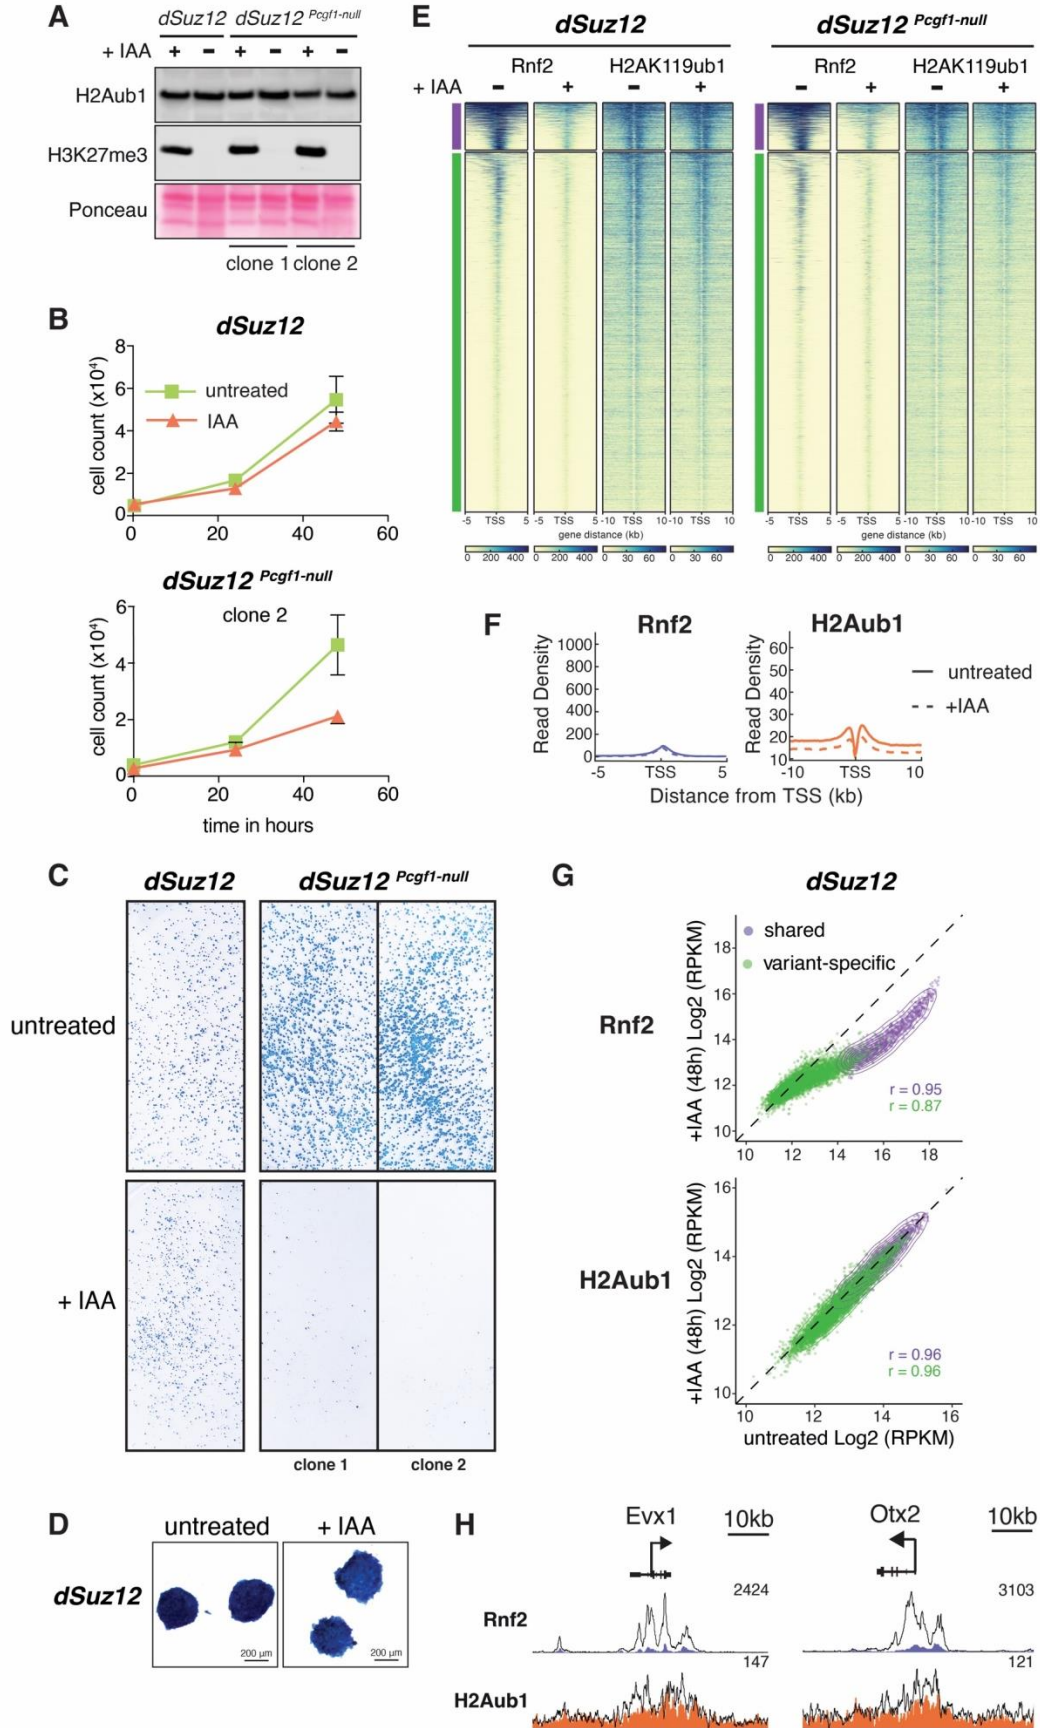

**Fig. S9. Consequences of combined depletion of Pcgf1 and Suz12.** (A) Proliferation assays of *dSuz12* mESCs grown in serum conditions for 72 hours without (untreated) or with 250 $\mu$ M IAA. Live cells were quantified by flow cytometry every 24 hours. Displayed is the median and standard deviation of four replicate measurements starting at 24 hours IAA (time point 0h). (B) Proliferation assays of *dSuz12* mESCs (top) and a second mESC clone of *dSuz12*<sup>Pcgf1-null</sup> (bottom) grown in serum conditions for 72h without (untreated) or with 250 $\mu$ M IAA. Live cells were quantified by flow cytometry every 24h. Displayed is the median and standard deviation of four replicate measurements starting at 24h IAA (time point 0h). (C) Slides show AP staining of *dSuz12* mESC colonies and two independent clones of *dSuz12*<sup>Pcgf1-null</sup> mESC colonies cultured in absence (untreated) or presence of 250 $\mu$ M IAA for five days. (D) Representative images of alkaline phosphatase staining of *dSuz12* mESC colonies cultured in absence (untreated) or presence of 250 $\mu$ M IAA for five days. (E) Heat maps of ChIP-seq of Rnf2 and H2AK119ub1 around CGI TSSs (+/- 5kb or +/- 10kb) at “shared” (violet) and “variant-specific” (green) genes in *dSuz12* and *dSuz12*<sup>Pcgf1-null</sup> mESCs before and after 48 hours of IAA treatment. Colored scales (bottom) show dynamic range of ChIP-seq. (F) Meta plots of Rnf2 and H2AK119ub1 (H2Aub1) ChIP-seq at “variant-specific” genes in *dSuz12*<sup>Pcgf1-null</sup> mESCs before and after 48 hours of IAA treatment corresponding to Fig. 6E). (G) Density scatter plot of Rnf2 (top, +/- 5kb around TSS) and in H2AK119ub1 (H2Aub1) (bottom, +/- 10kb around TSS) signals in untreated and IAA-treated *dSuz12* mESCs. *r* - Pearson’s correlation coefficient, “shared” TSSs (violet), “variant-specific” TSSs (green). (G) Genomic screenshots of Rnf2 (violet) and H2AK119ub1 (H2Aub1 – orange) enrichments at two representative “shared” Polycomb target genes in untreated and IAA-treated *dSuz12*<sup>Pcgf1-null</sup> mESCs. Superimposed are levels in wild-type mESCs (black line).

**Table. S1. Antibodies used for western blot**

| Name                     | Cat #      | Vendor            | Host   | Dilution |
|--------------------------|------------|-------------------|--------|----------|
| Rnf2                     | 5694S      | Cell Signaling    | rabbit | 1:1000   |
| Cbx7                     | 07-981     | Merck Millipore   | rabbit | 1:1000   |
| Rybp                     | 41787S     | Cell Signaling    | rabbit | 1:1000   |
| Eed                      | 61203      | Active Motif      | mouse  | 1:500    |
| LaminB1                  | ab16048    | Abcam             | rabbit | 1:5000   |
| Ring1                    | 2820S      | Cell Signaling    | rabbit | 1:1000   |
| Suz12                    | 3737S      | Cell Signaling    | rabbit | 1:1000   |
| Pcgf1                    | NBP1-82767 | Novus Biologicals | rabbit | 1:750    |
| Goat anti-Rabbit IgG HRP | 656120     | Invitrogen        | goat   | 1:10000  |
| anti-Mouse IgG HRP       | W4021      | Promega           | goat   | 1:2500   |

**Table. S2. DNA constructs and sgRNAs**

| Construct                            | sgRNA sequence (5' - 3') |
|--------------------------------------|--------------------------|
| CP045_Rnf2_homology_arms_GFP_AID     |                          |
| CP047_Rybp_homology_arms_AID_GFP     |                          |
| CP048_Suz12_homology_arms_AID_GFP    |                          |
| CP049_sgRNA_Rnf2                     | GCACAGCCTGAGACATTTCT     |
| CP051_sgRNA_Rybp                     | GAATCTTTCTGAGATTGCACA    |
| CP052_sgRNA_Suz12                    | GCAGTGTCTGTTCAAACATG     |
| CP053_RRL-SFFV-OsTir1-3xMyc-T2A-Puro |                          |
| jz031_Suz12-null                     | CCAATAAGACAAGTCCTAC      |
| jz030_Suz12-null                     | CTGTTTAGAGTAACTCGTCC     |
| jz037_Ring1-null                     | TCTTTTGTGTTGCAGGCC       |
| jz036_Ring1-null                     | ATCGTCACCGCCCTGCGGAG     |
| SG005_sgRNA_Pcgf1                    | TGAGGTCCGCCATCTCCGAA     |
| SG006_sgRNA_Pcgf1                    | CCTTCTGTCTCTAGAACA       |
| HFM027-ZFHD1-FLAG-Pcgf3-P2A-mCherry  |                          |

**Table. S3. mESC lines**

| ID                              | Genotype                                                   |
|---------------------------------|------------------------------------------------------------|
| AN3-12                          | wild-type (parental haploid mESC line)                     |
| 515D10-E6                       | <i>Eed</i> -null mESCs ( <i>Eed</i> gene-trap)             |
| 515D10-A12                      | <i>dRybp</i> <sup><i>Eed</i>-null</sup> clone 1            |
| 515D10-C3                       | <i>dRybp</i> <sup><i>Eed</i>-null</sup> clone 2            |
| 515D10-Suz12D8-RybpB4           | <i>dRybp</i> <sup><i>Suz12</i>-null, <i>Eed</i>-null</sup> |
| 515D10-Suz12D8-RybpB4-EedrescA4 | <i>dRybp</i> <sup><i>Suz12</i>-null</sup>                  |
| AN3E9-A1                        | <i>Rybp</i> -null mESCs ( <i>Rybp</i> CRISPR KO)           |
| AN3E9-A8                        | <i>dSuz12</i> <sup><i>Rybp</i>-null</sup> clone 1          |
| AN3E9-B11                       | <i>dSuz12</i> <sup><i>Rybp</i>-null</sup> clone 2          |
| AN3-Suz12D8                     | <i>dSuz12</i> clone 1                                      |
| AN3-Suz12G7                     | <i>dSuz12</i> clone 2                                      |
| AN3-Suz12D8-P1A2                | <i>dSuz12</i> <sup><i>Pcgf1</i>-null</sup> clone 1         |
| AN3-Suz12D8-P1A3                | <i>dSuz12</i> <sup><i>Pcgf1</i>-null</sup> clone 2         |
| D10B3C10-G9                     | <i>Ring1</i> -null mESCs ( <i>Ring1</i> CRISPR KO)         |
| D10B3C10-B10                    | <i>dRnf2</i> <sup><i>Ring1</i>-null</sup> clone 1          |
| D10B3C10-C2                     | <i>dRnf2</i> <sup><i>Ring1</i>-null</sup> clone 2          |



Fig. 2A and Fig. S3B

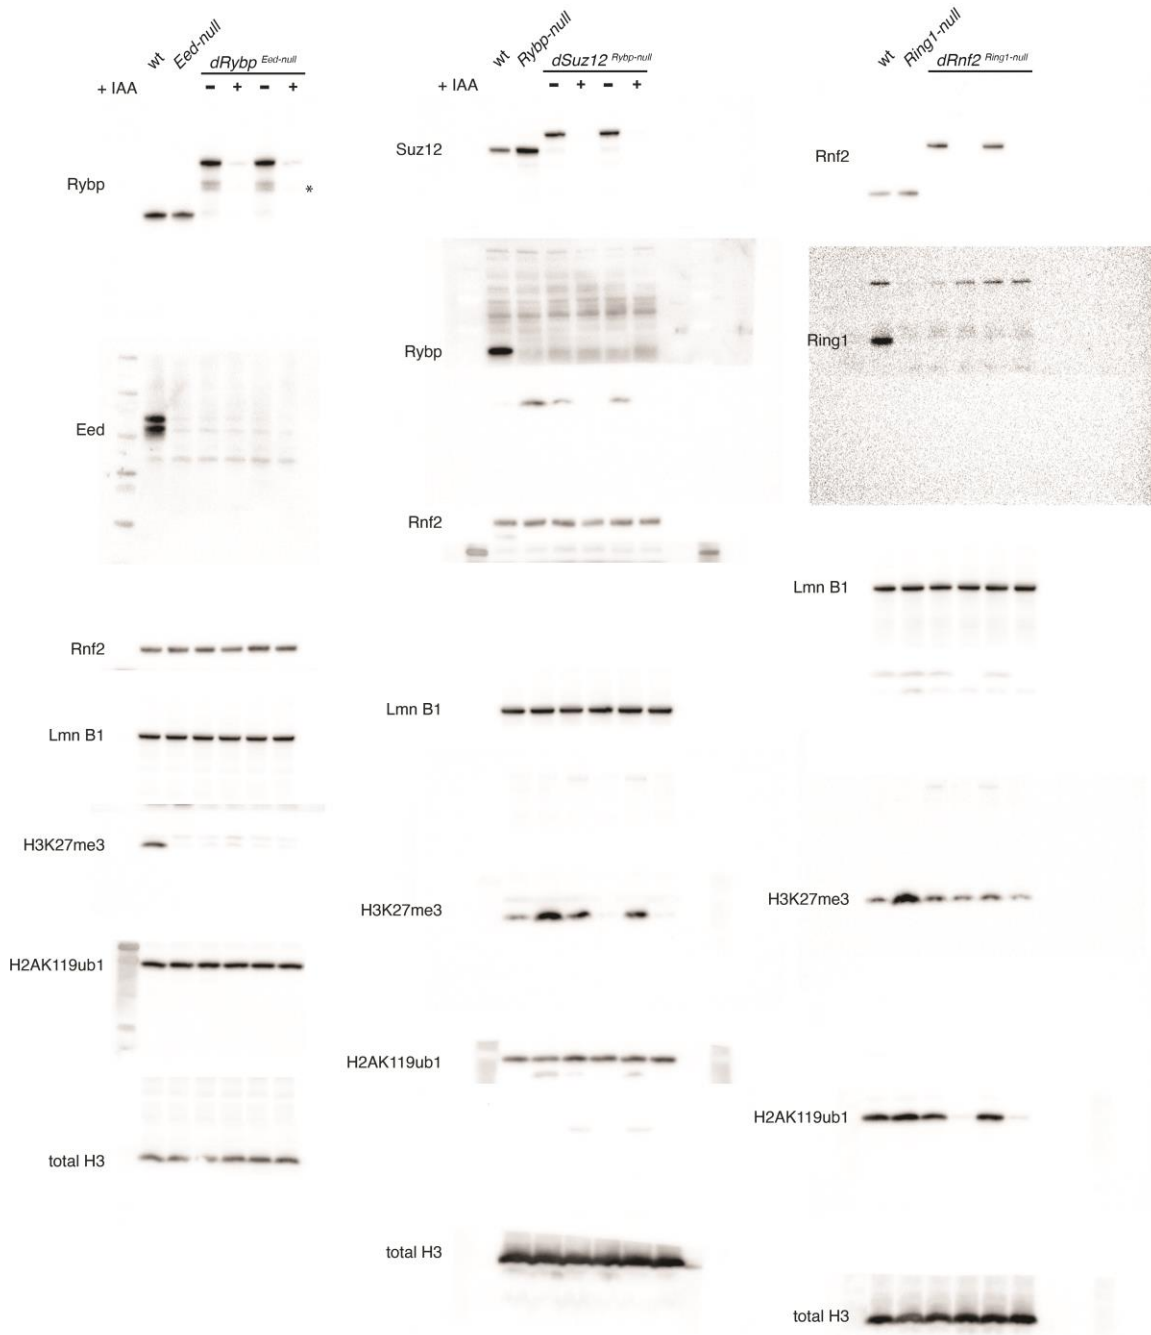

**Uncropped western blots of proteins from Fig. 2A and fig. S3B.** Western blots of PcG protein expression and histone modifications in wild-type, *Eed*-null mESCs and two independent clones

of dRybp Eed-null mESCs (left), in wild-type, Rybp-null mESCs and two independent clones of dSuz12 Rybp-null mESCs (center) and in wild-type, Ring1-null mESCs and two independent clones of dRnf2 Ring1-null mESCs (right). IAA treatment (250  $\mu$ M) for 24 hours. Lmn B1 and total histone H3 serve as loading controls.

Fig. S5B, Fig. Fig. 6A and Fig. S9A

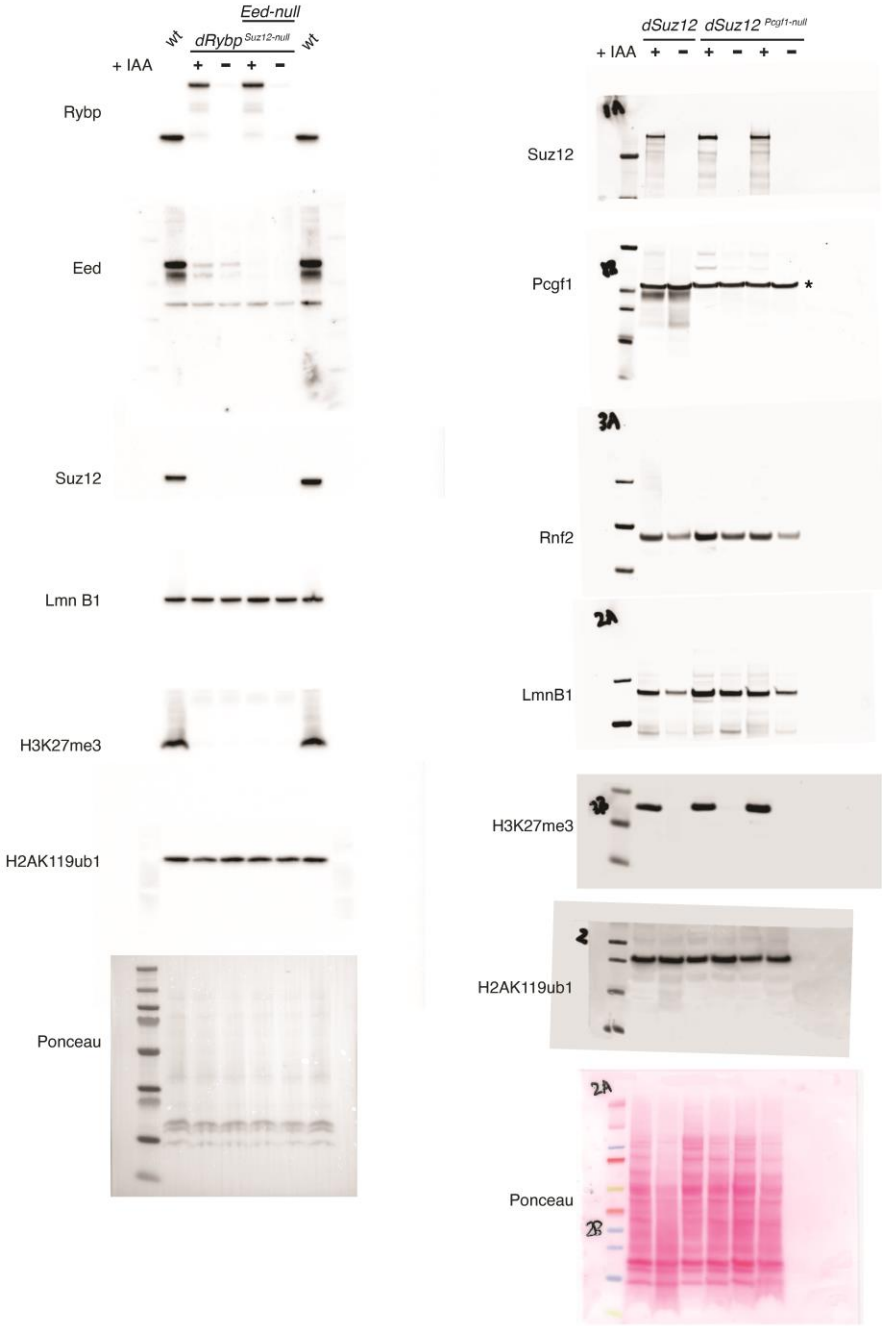

**Uncropped western blots of proteins from figs. S5B, S6A, and S9A.** Western blots of PcG protein expression and histone modifications in wild-type, *dRybp* *Suz12*-null mESCs and *dRybp*

Suz12-null, Eed-null mESCs (left) and in dSuz12 mESCs and two independent clones of dSuz12 Pcgf1-null mESCs (right). IAA treatment (250  $\mu$ M) for 24 hours. Lmn B1 and Ponceau membrane staining serve as loading controls.
